# Supplementary material for: Associations between Residential Greenness and Influenza Virus Infection in China: An Individual-Level, National, Cross-Sectional Study, 2010–2017
Source: Research Square preprint supplement (doi:10.21203/rs.3.rs-6706883/v1), 2025-05-23
Supplement: Supplementary file 1 [file 367ad460466e1283d55c08fa.docx]

**Associations between** **Residential Greenness and Influenza Virus Infection in China: An Individual-Level, National, Cross-Sectional Study, 2010–2017**

**Supplementary material**

**TableS1** The demographic characteristics of the 3,131,881 participates.

| **Characteristics** | **N(%)** |
| --- | --- |
| **Gender** |  |
| Male | 1703584(54.39%) |
| Female | 1428297(45.61%) |
| **Age** |  |
| 0-17 | 2003480(63.97%) |
| 18-59 | 952084(30.40%) |
| ≥60 | 176317(5.63%) |
| **Region** |  |
| Northern China | 1176385(37.56%) |
| Southern China | 1955496(62.44%) |
| **Influenza tested result** |  |
| Influenza A positive | 286773(9.16%) |
| Influenza B positive | 160973(5.14%) |
| Negative | 2682481(85.65%) |
| **City scale** |  |
| Micropolis | 468562(14.96%) |
| Medium-sized city | 837738(26.75%) |
| Large city | 928706(29.65%) |
| Super city | 253979(8.11%) |
| Megacity | 392969(12.55%) |
| **Season** |  |
| Spring | 801832(25.60%) |
| Summer | 631795(20.17%) |
| Fall | 781243(24.94%) |
| Winter | 917011(29.28%) |
| **Year** |  |
| 2010 | 273676(8.74%) |
| 2011 | 220758(7.05%) |
| 2012 | 244882(7.82%) |
| 2013 | 393429(12.56%) |
| 2014 | 496270(15.85%) |
| 2015 | 500501(15.98%) |
| 2016 | 529255(16.90%) |
| 2017 | 473110(15.11%) |


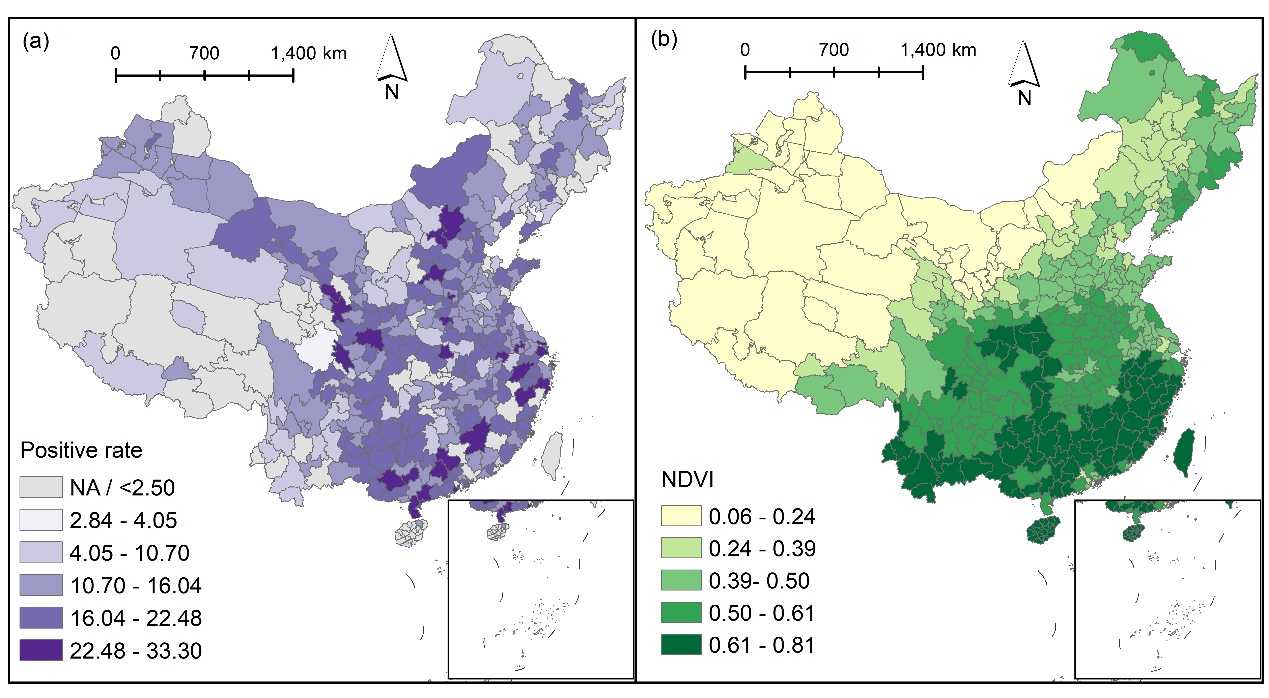


**FigureS1** Distribution of city-level influenza positivity and NDVI from 2010-2017. (a) average influenza positivity, (b) average monthly NDVI.

**TableS2** Associations between Residential Greenness and Seasonal Influenza among Children Aged <18 years.

| **Variables** | **Aged 0-6 years** | **Aged 7-17 years** |
| --- | --- | --- |
| NDVI(per0.171) | 0.996(0.977,1.016) | 1.104(1.079,1.129) |

The analysis included data for 609852 ILI cases. In different subgroups, odds ratio(OR) and the 95% Confidence Interval (CI) were reported. NDVI: normalized difference vegetation index.

**TableS3** Associations between Residential Greenness and Seasonal Influenza. (residential greenness exposure was measured by the monthly NDVI within a 1 km radius of the ILI residence.)

| **Variables** | **Model1**  **(OR)** | **Model2**  **(OR)** | **Model3**  **(OR)** | **Model4**  **(OR)** |
| --- | --- | --- | --- | --- |
| NDVI (per 0.171) | 0.608*** | 0.860*** | 0.901*** | 0.952*** |
| Gender (Ref Female) | 0.987* | 0.990 | 0.991 | 0.991 |
| Age (years) | 1.006*** | 1.007*** | 1.007*** | 1.006*** |
| Region (Ref Southern) | 0.607*** | 0.457*** | 0.443*** | 0.507*** |
| Mean temperature (K) |  | 0.965*** | 0.971*** | 0.983*** |
| Precipitation (mm) |  | 1.005*** | 1.006*** | 1.004*** |
| Relative humidity (%) |  | 0.993*** | 0.992*** | 0.993*** |
| Sunshine duration (h) |  | 0.976*** | 0.988*** | 0.995*** |
| Wind speed (m/s) |  | 0.965*** | 1.013** | 1.009* |
| O3 (ug/m3) |  |  | 0.997*** | 0.996*** |
| PM2.5 (ug/m3) |  |  | 1.002*** | 1.002*** |
| Spring (Ref Winter) |  |  |  | 0.819*** |
| Summer (Ref Winter) |  |  |  | 0.922*** |
| Fall (Ref Winter) |  |  |  | 0.470*** |
| 2011(Ref2010) |  |  |  | 0.578*** |
| 2012(Ref2010) |  |  |  | 1.111*** |
| 2013(Ref2010) |  |  |  | 0.685*** |
| 2014(Ref2010) |  |  |  | 1.066*** |
| 2015(Ref2010) |  |  |  | 0.768*** |
| 2016(Ref2010) |  |  |  | 1.713*** |
| 2017(Ref2010) |  |  |  | 1.215*** |

The analysis included data for 1012430 ILI cases. The residential greenness exposure metric was modified to the monthly NDVI within a 1 km radius of the ILI residence. Model 1 was adjusted only for demographic factors (gender, age, and geographic region). Model 2 was further adjusted for meteorological factors (temperature, relative humidity, precipitation, wind speed, and sunshine duration) on the basis of Model 1. Model 3 included additional adjustments for air pollutants (PM2.5, O3). Model 4 was a fully adjusted model that incorporated the monitoring year and seasonality based on Model 3. OR: odds ratio. NDVI: normalized difference vegetation index.

* p<0.05, ** p<0,01. *** p<0.001

**TableS4** Associations between Residential Greenness and Seasonal Influenza. (meteorological and air pollutant exposure levels were characterized using data from the first day before the onset of influenza symptoms.)

| **Variables** | **Model1**  **(OR)** | **Model2**  **(OR)** | **Model3**  **(OR)** | **Model4**  **(OR)** |
| --- | --- | --- | --- | --- |
| NDVI (per 0.171) | 0.621*** | 0.876*** | 0.908*** | 0.963*** |
| Gender (Ref Female) | 0.985** | 0.989 | 0.990 | 0.990 |
| Age (years) | 1.006*** | 1.007*** | 1.007*** | 1.006*** |
| Region (Ref Southern) | 0.623*** | 0.470*** | 0.456*** | 0.527*** |
| Mean temperature (K) |  | 0.964*** | 0.969*** | 0.982*** |
| Precipitation (mm) |  | 1.002*** | 1.003*** | 1.002*** |
| Relative humidity (%) |  | 0.995*** | 0.994*** | 0.995*** |
| Sunshine duration (h) |  | 0.985*** | 0.994*** | 0.999 |
| Wind speed (m/s) |  | 0.973*** | 1.008* | 1.002 |
| O3 (ug/m3) |  |  | 0.998*** | 0.996*** |
| PM2.5 (ug/m3) |  |  | 1.002*** | 1.002*** |
| Spring (Ref Winter) |  |  |  | 0.798*** |
| Summer (Ref Winter) |  |  |  | 0.875*** |
| Fall (Ref Winter) |  |  |  | 0.451*** |
| 2011(Ref2010) |  |  |  | 0.574*** |
| 2012(Ref2010) |  |  |  | 1.113*** |
| 2013(Ref2010) |  |  |  | 0.688*** |
| 2014(Ref2010) |  |  |  | 1.063*** |
| 2015(Ref2010) |  |  |  | 0.760*** |
| 2016(Ref2010) |  |  |  | 1.704*** |
| 2017(Ref2010) |  |  |  | 1.188*** |

The analysis included data for 1012430 ILI cases. Meteorological and air pollutant exposure levels were characterized using data from the first day before the onset of influenza symptoms. Model 1 was adjusted only for demographic factors (gender, age, and geographic region). Model 2 was further adjusted for meteorological factors (temperature, relative humidity, precipitation, wind speed, and sunshine duration) on the basis of Model 1. Model 3 included additional adjustments for air pollutants (PM2.5, O3). Model 4 was a fully adjusted model that incorporated the monitoring year and seasonality based on Model 3. OR: odds ratio. NDVI: normalized difference vegetation index.

* p<0.05, ** p<0,01. *** p<0.001

**TableS5** Associations between Residential Greenness and Seasonal Influenza. (meteorological and air pollutant exposure levels were characterized using data from the second day before the onset of influenza symptoms.)

| **Variables** | **Model1**  **(OR)** | **Model2**  **(OR)** | **Model3**  **(OR)** | **Model4**  **(OR)** |
| --- | --- | --- | --- | --- |
| NDVI (per 0.171) | 0.621*** | 0.888*** | 0.923*** | 0.971*** |
| Gender (Ref Female) | 0.985** | 0.989 | 0.990 | 0.990 |
| Age (years) | 1.006*** | 1.007*** | 1.007*** | 1.006*** |
| Region (Ref Southern) | 0.623*** | 0.464*** | 0.450*** | 0.516*** |
| Mean temperature (K) |  | 0.963*** | 0.968*** | 0.981*** |
| Precipitation (mm) |  | 1.003*** | 1.004*** | 1.003*** |
| Relative humidity (%) |  | 0.994*** | 0.993*** | 0.994*** |
| Sunshine duration (h) |  | 0.982*** | 0.992*** | 0.997** |
| Wind speed (m/s) |  | 0.977*** | 1.013*** | 1.009* |
| O3 (ug/m3) |  |  | 0.997*** | 0.996*** |
| PM2.5 (ug/m3) |  |  | 1.002*** | 1.002*** |
| Spring (Ref Winter) |  |  |  | 0.807*** |
| Summer (Ref Winter) |  |  |  | 0.908*** |
| Fall (Ref Winter) |  |  |  | 0.466*** |
| 2011(Ref2010) |  |  |  | 0.575*** |
| 2012(Ref2010) |  |  |  | 1.113*** |
| 2013(Ref2010) |  |  |  | 0.687*** |
| 2014(Ref2010) |  |  |  | 1.063*** |
| 2015(Ref2010) |  |  |  | 0.763*** |
| 2016(Ref2010) |  |  |  | 1.714*** |
| 2017(Ref2010) |  |  |  | 1.199*** |

The analysis included data for 1012430 ILI cases. Meteorological and air pollutant exposure levels were characterized using data from the second day before the onset of influenza symptoms. Model 1 was adjusted only for demographic factors (gender, age, and geographic region). Model 2 was further adjusted for meteorological factors (temperature, relative humidity, precipitation, wind speed, and sunshine duration) on the basis of Model 1. Model 3 included additional adjustments for air pollutants (PM2.5, O3). Model 4 was a fully adjusted model that incorporated the monitoring year and seasonality based on Model 3. OR: odds ratio. NDVI: normalized difference vegetation index.

* p<0.05, ** p<0,01. *** p<0.001
